# Supplementary material for: Identification of a sex-specific genetic signature in dementia with Lewy bodies: a meta-analysis of genome-wide association studies
Source: bioRxiv or medRxiv preprint supplement (doi:10.1101/2022.11.22.22282597), 2022-11-22
Supplement: Supplementary file [file media-1.pdf]

# Identification of a sex-specific genetic signature in dementia with Lewy bodies: a meta-analysis of genome-wide association studies

## Supplementary Material

### Tables

Supplementary Table 1: Cohort 2 demographics

| Country | N cases | N Pathologically diagnosed | Male:Female Ratio | mean AAO | mean AAD |
|---------|---------|----------------------------|-------------------|----------|----------|
| France  | 83      | 0                          | 0.729             | 70.012   | NA       |
| Italy   | 76      | 0                          | 1.171             | 74.633   | NA       |
| Spain   | 71      | 39                         | 1.290             | 69.284   | 76.974   |
| Sweden  | 17      | 0                          | 3.25              | NA       | NA       |
| UK      | 170     | 67                         | 2.542             | 74.263   | 84.935   |
| USA     | 749     | 464                        | 1.592             | 65.654   | 78.513   |

Supplementary Table 2: Most significant traits in the sex-specific PRS extreme analysis using PHESANT PheWAS.

| Trait                                                                                                 | Dataset | Females_beta | Females_pvalue | Males_beta   | Males_pvalue |
|-------------------------------------------------------------------------------------------------------|---------|--------------|----------------|--------------|--------------|
| Diagnoses - ICD10: T81.0 Haemorrhage and haematoma complicating a procedure, not elsewhere classified | Female  | 0.451351213  | 0.000421335    | 0.051427236  | 0.700958368  |
| Illnesses of mother: Alzheimer's disease/dementia                                                     | Female  | 0.145696683  | 0.003817525    | 0.017015231  | 0.765773158  |
| Diagnoses - ICD10: E03.9 Hypothyroidism, unspecified                                                  | Female  | -0.165443639 | 0.005744626    | -0.026258722 | 0.835298292  |
| Non-cancer illness code, self-reported: emphysema/chronic bronchitis                                  | Female  | -0.373403662 | 0.00756735     | -0.255756069 | 0.049979716  |
| Manifestations of mania or irritability: I was easily distracted                                      | Female  | -0.242574836 | 0.009839811    | -0.029167398 | 0.780009899  |

|                                                                                              |      |              |             |                  |             |
|----------------------------------------------------------------------------------------------|------|--------------|-------------|------------------|-------------|
| Illnesses of father:<br>Parkinson's disease                                                  | Both | -0.270393573 | 0.004522213 | 0.330421492      | 0.00402649  |
|                                                                                              |      |              |             |                  |             |
| Diagnoses - ICD10: N20.0<br>Calculus of kidney                                               | Male | NA           | NA          | -<br>0.503786772 | 0.000430899 |
| Vitamin and mineral<br>supplements                                                           | Male | 0.004713217  | 0.879244127 | 0.126889535      | 0.000675662 |
| Sources of admission to<br>hospital (recoded): Usual<br>Place of residence                   | Male | -0.006891964 | 0.862007533 | -<br>0.140296139 | 0.000729451 |
| Methods of discharge from<br>hospital (recoded):<br>Discharged on clinical<br>advice/consent | Male | -0.009427029 | 0.80809518  | -<br>0.130092621 | 0.001325885 |
| Age high blood pressure<br>diagnosed                                                         | Male | -0.008057985 | 0.758183537 | -<br>0.075720567 | 0.001340258 |
| Diagnoses - ICD10: I95.9<br>Hypotension, unspecified                                         | Male | NA           | NA          | 0.432338452      | 0.003447078 |
| Diagnoses - ICD10: I25.2 Old<br>myocardial infarction                                        | Male | -0.003629735 | 0.980054755 | 0.240779171      | 0.004881535 |
| Diagnoses - ICD10: R69<br>Unknown and unspecified<br>causes of morbidity                     | Male | -0.110384936 | 0.131591628 | 0.224040866      | 0.007366213 |
| Glucose                                                                                      | Male | 0.013702507  | 0.377588451 | -<br>0.045358765 | 0.007599488 |
| Mean corpuscular<br>haemoglobin concentration                                                | Male | -0.00224893  | 0.879898208 | 0.042688652      | 0.008526511 |
| Illnesses of father: Stroke                                                                  | Male | -0.003953195 | 0.924900052 | -<br>0.119250341 | 0.009358861 |

## Figures

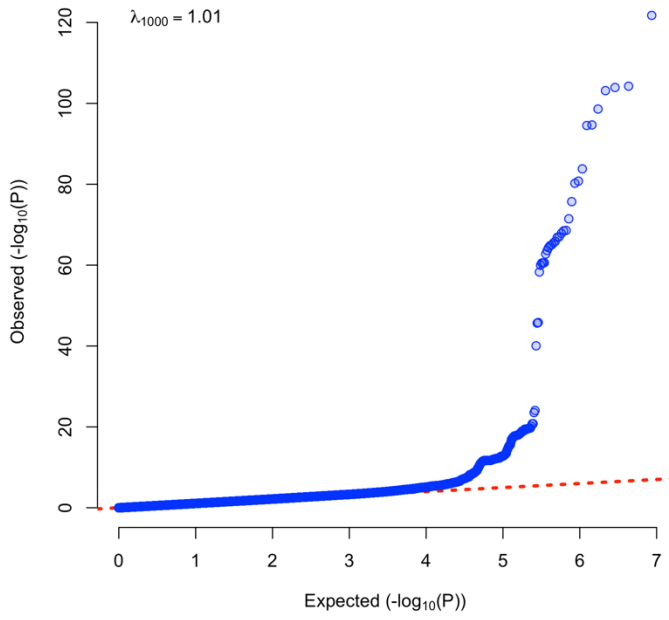

Supplementary Figure 1: Q-Q Plot of meta-analysis

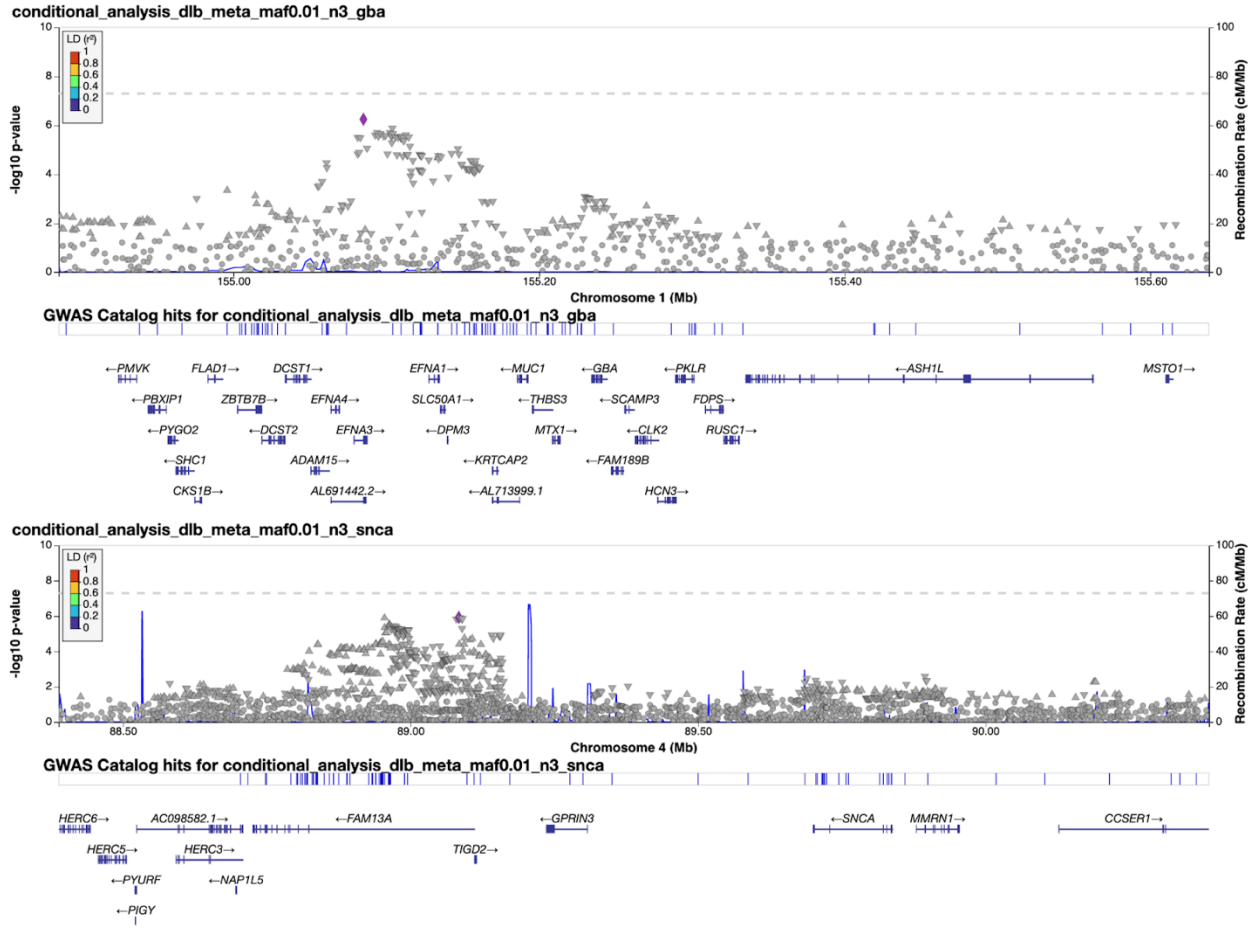

Supplementary Figure 2: Conditional analysis of SNCA and GBA loci revealed suggestive independent signals.

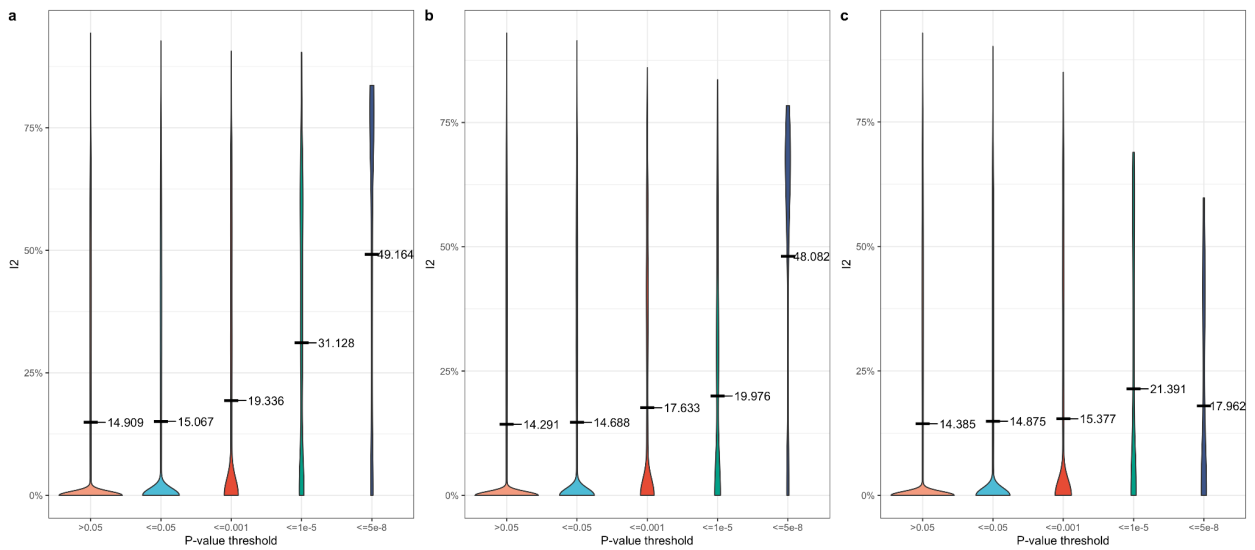

Supplementary Figure 3: Plots of  $I^2$  meta-analysis heterogeneity values for this model.  $I^2$  is defined as  $I^2 = 100\% \times (\text{Cochran's } Q\text{-df})/\text{Cochran's } Q$ . Black bar and label denotes group mean. a) Meta-analysis; b) Males from sex-stratified analysis; c) Females from sex-stratified analysis.

## **The GR@ACE study group**

Aguilera Nuria<sup>1</sup>, Alarcon Emilio<sup>1</sup>, Alegret Montserrat<sup>1,2</sup>, Boada Mercè<sup>1,2</sup>, Buendia Mar<sup>1</sup>, Cano Amanda<sup>1</sup>, Cañabate Pilar<sup>1,2</sup>, Carracedo Angel<sup>4,5</sup>, Corbatón-Anchuelo A<sup>6</sup>, de Rojas Itziar<sup>1,2</sup>, Diego Susana<sup>1</sup>, Espinosa Ana<sup>1,2</sup>, Gailhajenet Anna<sup>1</sup>, García-González Pablo<sup>1,2</sup>, Guitart Marina<sup>1</sup>, González-Pérez Antonio<sup>7</sup>, Ibarria Marta<sup>1</sup>, Lafuente Asunción<sup>1</sup>, Macias Juan<sup>8</sup>, Maroñas Olalla<sup>4</sup>, Martín Elvira<sup>1</sup>, Martínez Maria Teresa<sup>6</sup>, Marquié Marta<sup>1,2</sup>, Montreal Laura<sup>1</sup>, Moreno-Grau Sonia<sup>1,2</sup>, Moreno Mariona<sup>1</sup>, Raúl Nuñez-Llaves<sup>1</sup>, Olivé Clàudia<sup>1</sup>, Orellana Adelina<sup>1</sup>, Ortega Gemma<sup>1,2</sup>, Pancho Ana<sup>1</sup>, Pelejà Ester<sup>1</sup>, Pérez-Cordon Alba<sup>1</sup>, Pineda Juan A<sup>8</sup>, Puerta Raquel<sup>1</sup>, Preckler Silvia<sup>1</sup>, Quintela Inés<sup>3</sup>, Real Luis Miguel<sup>3,8</sup>, Rosende-Roca Maitee<sup>1</sup>, Ruiz Agustín<sup>1,2</sup>, Sáez Maria Eugenia<sup>7</sup>, Sanabria Angela<sup>1,2</sup>, Serrano-Rios Manuel<sup>6</sup>, Sotolongo-Grau Oscar<sup>1</sup>, Tàrraga Luís<sup>1,2</sup>, Valero Sergi<sup>1,2</sup>, Vargas Liliana<sup>1</sup>.

<sup>1</sup>Research Center and Memory clinic. ACE Alzheimer Center Barcelona, Universitat Internacional de Catalunya, Spain. <sup>2</sup>CIBERNED, Center for Networked Biomedical Research on Neurodegenerative Diseases, National Institute of Health Carlos III, Ministry of Economy and Competitiveness, Spain, <sup>3</sup>Dep. of Surgery, Biochemistry and Molecular Biology, School of Medicine. University of Málaga. Málaga, Spain, <sup>4</sup>Grupo de Medicina Xenómica, Centro Nacional de Genotipado (CEGEN-PRB3-ISCI). Universidad de Santiago de Compostela, Santiago de Compostela, Spain. <sup>5</sup>Fundación Pública Galega de Medicina Xenómica- CIBERER-IDIS, Santiago de Compostela, Spain. <sup>6</sup>Centro de Investigación Biomédica en Red de Diabetes y Enfermedades Metabólicas Asociadas, CIBERDEM, Spain, Hospital Clínico San Carlos, Madrid, Spain. <sup>7</sup>CAEBI. Centro Andaluz de Estudios Bioinformáticos, Sevilla, Spain, <sup>8</sup>Unidad Clínica de Enfermedades Infecciosas y Microbiología. Hospital Universitario de Valme, Sevilla, Spain.

## **DEGESCO consortium**

Adarmes-Gómez Astrid Daniela<sup>1,2</sup>, Aguilar Miquel<sup>3,4</sup>, Aguilera Nuria<sup>5</sup>, Alarcón-Martín Emilio<sup>5</sup>, Alcolea Daniel<sup>6,2</sup>, Alegret Montserrat<sup>5,2</sup>, Alonso María Dolores<sup>7</sup>, Alvarez Ignacio<sup>3,4</sup>, Álvarez Victoria<sup>8,9</sup>, Amer-Ferrer Guillermo<sup>10</sup>, Antequera Martirio<sup>11</sup>, Antonell Anna<sup>12</sup>, Antúnez Carmen<sup>13</sup>, Arias Pastor Alfonso<sup>14,15</sup>, Baquero Miquel<sup>16</sup>, Belbin Olivia<sup>6,2</sup>, Bernal Sánchez-Arjona María<sup>17</sup>, Boada Mercè<sup>5,2</sup>, Buendia Mar<sup>5</sup>, Buiza-Rueda Dolores<sup>1,2</sup>, Bullido María Jesús<sup>18,2,19,20</sup>, Buongiorno Mariateresa<sup>3,4</sup>, Burguera Juan Andrés<sup>21</sup>, Calero Miguel<sup>22,2,23</sup>, Cano Amanda<sup>5</sup>, Cañabate Pilar<sup>5</sup>, Cardona Serrate Fernando<sup>24,2,25</sup>, Carracedo Ángel<sup>26,27</sup>, Carrillo Fátima<sup>1,2</sup>, Casajeros María José<sup>28</sup>, Clarimon Jordi<sup>6,2</sup>, Corbatón-Anchuelo Arturo<sup>29,30</sup>, Corma-Gómez Anaïs<sup>31</sup>, De la Guía Paz<sup>32</sup>, de Rojas Itziar<sup>5,2</sup>, del Ser Teodoro<sup>33</sup>, Diego Susana<sup>5</sup>, Diez-Fairen Mónica<sup>3,4</sup>, Dols-Icardo Oriol<sup>6,2</sup>, Espinosa Ana<sup>5,2</sup>, Fernández-Fuertes Marta<sup>31</sup>, Fortea Juan<sup>6,2</sup>, Franco-Macias Emilio<sup>17,2</sup>, Frank-García Ana<sup>34,2,35,20</sup>, Gailhajenet Anna<sup>5</sup>, García-Alberca Jose María<sup>32</sup>, García-González Pablo<sup>5,2</sup>, García-Madrona Sebastián<sup>28,36</sup>, Garcia-Ribas Guillermo<sup>28,36</sup>, Garrote-Espina Lorena<sup>1,2</sup>, Gómez-Garre Pilar<sup>1,2</sup>, González-Pérez Antonio<sup>37</sup>, Guitart Marina<sup>5</sup>, Huerto Vilas Raquel<sup>14,15</sup>, Ibarria Marta<sup>5</sup>, Jesús Silvia<sup>1,2</sup>, Labrador Espinosa Miguel Angel<sup>1,2</sup>, Lafuente Asunción<sup>5</sup>, Lage Carmen<sup>38,2</sup>, Legaz Agustina<sup>11</sup>, Lleó Alberto<sup>6,2</sup>, López-García Sara<sup>39,2</sup>, Lopez de Munain Adolfo<sup>40,41,2,42</sup>, Macías Juan<sup>31</sup>, Macias-García Daniel<sup>1,2</sup>, Manzanares Salvadora<sup>11</sup>, Marín Marta<sup>17</sup>, Marín-Muñoz Juan<sup>11</sup>, Maroñas Olalla<sup>26</sup>, Marquié Marta<sup>5,2</sup>, Martín Elvira<sup>5</sup>, Martín Montés Angel<sup>43,2,35</sup>, Martínez Begoña<sup>11</sup>, Martínez Victoriana<sup>11</sup>, Martínez-Lage Álvarez Pablo<sup>44</sup>, Martínez-Larrad María Teresa<sup>29,30</sup>, Martinez de Pancorbo Marian<sup>45</sup>, Martínez Rodríguez

Carmen<sup>46,9</sup>, Medina Miguel<sup>2,22</sup>, Mendioroz Iriarte Maite<sup>47</sup>, Mendoza Silvia<sup>32</sup>, Menéndez-González Manuel<sup>48,9,49</sup>, Mir Pablo<sup>1,2,50</sup>, Molina-Porcel Laura<sup>51,12</sup>, Montreal Laura<sup>5</sup>, Moreno Mariona<sup>5</sup>, Moreno Fermin<sup>40,2,42</sup>, Muñoz-Delgado Laura<sup>1,2</sup>, Noguera Perea Fuensanta<sup>11</sup>, Núñez-Llaves Raúl<sup>5</sup>, Olivé Clàudia<sup>5</sup>, Ortega Gemma<sup>5,2</sup>, Pancho Ana<sup>5</sup>, Pastor Ana Belén<sup>22,52</sup>, Pastor Pau<sup>53,54</sup>, Pelejá Ester<sup>5</sup>, Pérez-Cordón Alba<sup>5</sup>, Pérez-Tur Jordi<sup>24,2,25</sup>, Perriñán María Teresa<sup>1,2</sup>, Pineda Juan Antonio<sup>31</sup>, Pineda-Sánchez Rocío<sup>1,2</sup>, Piñol-Ripoll Gerard<sup>14,15</sup>, Preckler Silvia<sup>5</sup>, Puerta Raquel<sup>5</sup>, Quintela Inés<sup>26</sup>, Rábano Alberto<sup>22,52,2</sup>, Real Luis Miguel<sup>31,55</sup>, Real de Asúa Diego<sup>56</sup>, Rodríguez-Rodríguez Eloy<sup>38,2</sup>, Rosas Allende Irene<sup>8,9</sup>, Rosende-Roca Maitée<sup>5,2</sup>, Royo Jose Luis<sup>57</sup>, Ruiz Agustín<sup>5,2</sup>, Sáez María Eugenia<sup>37</sup>, Sanabria Ángela<sup>5,2</sup>, Sánchez-Juan Pascual<sup>58,2,59</sup>, Sánchez-Valle Raquel<sup>12</sup>, Sastre Isabel<sup>18,2</sup>, Serrano-Ríos Manuel<sup>29,30</sup>, Sotolongo-Grau Oscar<sup>5</sup>, Tàrraga Lluís<sup>5,2</sup>, Valero Sergi<sup>5,2</sup>, Vargas Liliana<sup>5</sup>, Vicente María Pilar<sup>11</sup>, Vivancos-Moreau Laura<sup>11</sup>, Zulaica Miren<sup>42,2</sup>.

<sup>1</sup>Unidad de Trastornos del Movimiento, Servicio de Neurología y Neurofisiología. Instituto de Biomedicina de Sevilla (IBiS), Hospital Universitario Virgen del Rocío/CSIC/Universidad de Sevilla, Seville, Spain, <sup>2</sup>CIBERNED, Network Center for Biomedical Research in Neurodegenerative Diseases, National Institute of Health Carlos III, Madrid, Spain, <sup>3</sup>Fundació Docència i Recerca Mútua Terrassa, Terrassa, Barcelona, Spain, <sup>4</sup>Memory Disorders Unit, Department of Neurology, Hospital Universitari Mutua de Terrassa, Terrassa, Barcelona, Spain, <sup>5</sup>Research Center and Memory Clinic. Ace Alzheimer Center Barcelona – Universitat Internacional de Catalunya, Spain., <sup>6</sup>Department of Neurology, II B Sant Pau, Hospital de la Santa Creu i Sant Pau, Universitat Autònoma de Barcelona, Barcelona, Spain., <sup>7</sup>Servei de Neurologia. Hospital Clínic Universitari de València, <sup>8</sup>Laboratorio de Genética. Hospital Universitario Central de Asturias, Oviedo, Spain, <sup>9</sup>Instituto de Investigación Sanitaria del Principado de Asturias (ISPA), <sup>10</sup>Department of Neurology, Hospital Universitario Son Espases, Palma, Spain, <sup>11</sup>Unidad de Demencias. Hospital Clínico Universitario Virgen de la Arrixaca, Palma, Spain, <sup>12</sup>Alzheimer's disease and other cognitive disorders unit. Service of Neurology. Hospital Clínic of Barcelona. Institut d'Investigacions Biomèdiques August Pi i Sunyer, University of Barcelona, Barcelona, Spain, <sup>13</sup>Unidad de Demencias, Hospital Clínico Universitario Virgen de la Arrixaca, Murcia, Spain., <sup>14</sup>Unitat Trastorns Cognitius, Hospital Universitari Santa Maria de Lleida, Lleida, Spain, <sup>15</sup>Institut de Recerca Biomedica de Lleida (IRBLLeida), Lleida, Spain, <sup>16</sup>Servei de Neurologia, Hospital Universitari i Politècnic La Fe, Valencia, Spain., <sup>17</sup>Unidad de Demencias, Servicio de Neurología y Neurofisiología. Instituto de Biomedicina de Sevilla (IBiS), Hospital Universitario Virgen del Rocío/CSIC/Universidad de Sevilla, Seville, Spain, <sup>18</sup>Centro de Biología Molecular Severo Ochoa (UAM-CSIC), <sup>19</sup>Instituto de Investigación Sanitaria 'Hospital la Paz' (IdIPaz), Madrid, Spain, <sup>20</sup>Universidad Autónoma de Madrid, <sup>21</sup>Servei de Neurologia, Hospital Universitari i Politècnic La Fe, Valencia, Spain, <sup>22</sup>CIEN Foundation/Queen Sofia Foundation Alzheimer Center, <sup>23</sup>UFIEC, Instituto de Salud Carlos III, <sup>24</sup>Unitat de Genètica Molecular, Institut de Biomedicina de València-CSIC, Valencia, Spain, <sup>25</sup>Unidad Mixta de Neurología Genética, Instituto de Investigación Sanitaria La Fe, Valencia, Spain., <sup>26</sup>Grupo de Medicina Xenómica, Centro Nacional de Genotipado (CEGEN-PRB3-ISCI). Universidade de Santiago de Compostela, Santiago de Compostela, Spain., <sup>27</sup>Fundación Pública Galega de Medicina Xenómica- CIBERER-IDIS, Santiago de Compostela, Spain., <sup>28</sup>Hospital Universitario Ramon y Cajal, IRYCIS, Madrid, <sup>29</sup>Instituto de Investigación Sanitaria, Hospital Clínico San Carlos (IdISSC), Madrid, Spain, <sup>30</sup>Spanish Biomedical Research Centre in Diabetes and Associated Metabolic Disorders(CIBERDEM), Madrid, Spain, <sup>31</sup>Unidad Clínica de Enfermedades Infecciosas y Microbiología. Hospital Universitario de Valme, Sevilla, Spain, <sup>32</sup>Alzheimer Research Center & Memory Clinic, Instituto Andaluz de Neurociencia, Málaga, Spain., <sup>33</sup>Department of Neurology/CIEN Foundation/Queen Sofia Foundation Alzheimer Center, <sup>34</sup>Department of Neurology, La Paz University Hospital. Instituto de Investigación Sanitaria del Hospital Universitario La Paz. IdiPAZ., <sup>35</sup>Hospital La Paz Institute for Health Research, IdiPAZ, Madrid, Spain, <sup>36</sup>None, <sup>37</sup>CAEBI, Centro Andaluz de Estudios Bioinformáticos, Sevilla, Spain., <sup>38</sup>Neurology Service, Marqués de Valdecilla University Hospital (University of Cantabria and IDIVAL), Santander, Spain., <sup>39</sup>Service of Neurology, University Hospital Marqués de Valdecilla, IDIVAL, University of Cantabria, Santander, Spain, <sup>40</sup>Department of Neurology. Hospital Universitario Donostia. San Sebastian, Spain, <sup>41</sup>Department of Neurosciences. Faculty of Medicine and Nursery. University of the Basque Country, San Sebastián, Spain, <sup>42</sup>Neurosciences Area. Instituto Biodonostia. San Sebastian, Spain, <sup>43</sup>Department of Neurology, La Paz University Hospital, <sup>44</sup>Centro de Investigación y Terapias

Avanzadas. Fundación CITA-alzheimer, San Sebastian, Spain, <sup>45</sup>BIOMICS País Vasco; Centro de investigación Lascaray, Universidad del País Vasco UPV/EHU, Vitoria-Gasteiz, Spain, <sup>46</sup>Hospital de Cabueñes, Gijón, Spain, <sup>47</sup>Navarrabiomed, Pamplona, Spain, <sup>48</sup>Servicio de Neurología. Hospital Universitario Central de Asturias, Oviedo, Spain, <sup>49</sup>Departamento de Medicina, Universidad de Oviedo, Oviedo, Spain, <sup>50</sup>Departamento de Medicina, Facultad de Medicina, Universidad de Sevilla, Seville, Spain., <sup>51</sup>Neurological Tissue Bank of the Biobanc-Hospital Clinic-IDIBAPS, Institut d'Investigacions Biomèdiques August Pi i Sunyer, Barcelona, Spain, <sup>52</sup>BT-CIEN, <sup>53</sup>Unit of Neurodegenerative diseases, Department of Neurology, Hospital Germans Trias i Pujol , Badalona, Barcelona, <sup>54</sup>Neurodegenerative Diseases Research Laboratory, Germans Trias i Pujol Research Laboratory, Badalona, Barcelona, <sup>55</sup>Departamento de Especialidades Quirúrgicas, Bioquímica e Inmunología. Facultad de Medicina. Universidad de Málaga. Málaga, Spain, <sup>56</sup>Hospital Universitario La Princesa, Madrid, Spain, <sup>57</sup>Departamento de Especialidades Quirúrgicas, Bioquímica e Inmunología. School of Medicine. University of Malaga. Málaga, Spain, <sup>58</sup>Alzheimer's Centre Reina Sofia-CIEN Foundation, Centro de Investigación Biomédica en Red sobre Enfermedades Neurodegenerativas (CIBERNED), Madrid, Spain, <sup>59</sup>IDIVAL
